# Supplementary material
Source: publisher figshare collection journal article supplement (https://acs.figshare.com/ndownloader/files/5697699)
Supplement: Supplementary file 1 [file 5697699]

## SUPPORTING INFORMATION FOR

### The Construction of a Functional Layered Solid using the Tetrakis(imidazoly)borate Coordinating Anion

Barton H. Hamilton, Kathryn A. Kelly, Todd A. Wagler, Matthew P. Espe and Christopher J. Ziegler\*.

Department of Chemistry, University of Akron,  
Akron, Ohio 44325

#### Crystal Structure Experimental Details

A colorless plate-like crystal of  $C_{12}H_{14.65}BN_9O_{4.32}Pb$ , approximate dimensions  $0.02 \times 0.18 \times 0.23 \text{ mm}^3$ , was used for X-ray crystallographic analysis. The X-ray intensity data were measured at 100K (Bruker KRYO-FLEX) on a Bruker SMART APEX CCD-based X-ray diffractometer system equipped with a Mo-target X-ray tube ( $\lambda = 0.71073 \text{ \AA}$ ) operated at 2000 watts power. The detector was placed at a distance of 5.009 cm. from the crystal.

A total of 1497 frames were collected with a scan width of  $0.3^\circ$  and an exposure time of 20 sec./frame. The total data collection time was 10.90 hours. The frames were integrated with the Bruker SAINT software package using a narrow-frame integration algorithm. The integration of the data using a triclinic unit cell yielded a total of 9837 reflections to a maximum  $2\theta$  angle of  $66.13^\circ$  ( $0.65^\circ$  resolution), of which 5991 were independent (redundancy 1.64, completeness = 86.7%,  $R_{\text{int}} = 2.70\%$ ,  $R_{\text{sig}} = 5.04\%$ ) and 5391 (90.0%) were greater than  $4\sigma(F)$ . The final cell constants of  $a = 8.5337(8)$ ,  $b = 10.7463(9)$ ,  $c = 11.2476(10)$ ,  $\alpha = 74.6840(10)^\circ$ ,  $\beta = 79.2840(10)^\circ$ ,  $\gamma = 67.0120(10)^\circ$ , volume =  $911.84(14) \text{ \AA}^3$ , are based upon the refinement of the XYZ-centroids of 5744 reflections above  $20\sigma(I)$ . Analysis of the data showed negligible decay during data collection. The data were corrected for absorption with the SADABS program (ratio of minimum to maximum apparent transmission: 0.690050).

The structure was solved and refined using the Bruker SHELXTL (Version 6.1) Software Package, using the space group P-1, with  $Z = 2$  for the formula unit  $C_{12}H_{14.65}BN_9O_{4.32}Pb$ . The final anisotropic full-matrix least-squares refinement on  $F^2$  converged at  $R1 = 3.16\%$ ,  $wR2 = 7.21\%$  and a goodness-of-fit of 1.075. The largest peak on the final difference map was  $2.690 \text{ e}^-/\text{\AA}^3$ . The calculated density for  $C_{12}H_{14.65}BN_9O_{4.32}Pb$  is  $2.084 \text{ g/cm}^3$  and  $F(000)$  is  $543 \text{ e}^-$ .

### Solid-State NMR Experimental Details

Solid-state NMR spectra were obtained on a Varian Unityplus-200 (4.7T) spectrometer using Doty Scientific supersonic and standard MAS probes. All samples were packed into 7 mm silicon nitride rotors with Kel-F end caps.  $^{15}\text{N}$  Bloch decay spectra were acquired using a 200 sec relaxation delay and a spinning speed of 2.7 kHz.  $^{207}\text{Pb}$  spectra were acquired using a Hahn-echo sequence with a 5 sec relaxation delay and a spinning speed of 8 kHz.  $^{15}\text{N}$  and  $^{207}\text{Pb}$  chemical shifts were referenced to solid  $^{15}\text{NH}_4^{15}\text{NO}_3$  ( $\delta_{\text{NH}_4} = 0$  ppm) and 0.5 M  $\text{Pb}(\text{NO}_3)_2$  ( $\delta_{\text{pb}} = -2941$  ppm) as an external reference, respectively. A 55 kHz decoupling field strength was used in all experiments.

---
